# Supplementary material
Source: Springer Nature journal article supplement (https://www.springermedizin.de/resource/supplementary/40478_2013_134_MOESM3_ESM.pdf/25658058)
Supplement: MOESM3 [file 25658058]

**Title:** The *Arctic APP* mutation leads to Alzheimer's disease pathology with highly variable topographic deposition of differentially truncated A $\beta$

**Journal:** Acta Neuropathologica Communications

**Authors:** Hannu Kalimo<sup>1</sup>, Maciej Lalowski, Nenad Bogdanovic, Ola Philipson, Thomas D. Bird, David Nochlin, Gerard D. Schellenberg, RoseMarie Brundin, Tommie Olofsson, Marc Baumann, Oliver Wirths, Thomas A. Bayer, Lars N.G. Nilsson, Hans Basun, Lars Lannfelt, Martin Ingelsson

**Corresponding author:** <sup>1</sup>Hannu Kalimo, Department of Pathology, University and University Hospital of Helsinki, Helsinki, Finland,

**E-mail:** hannu.kalimo@helsinki.fi

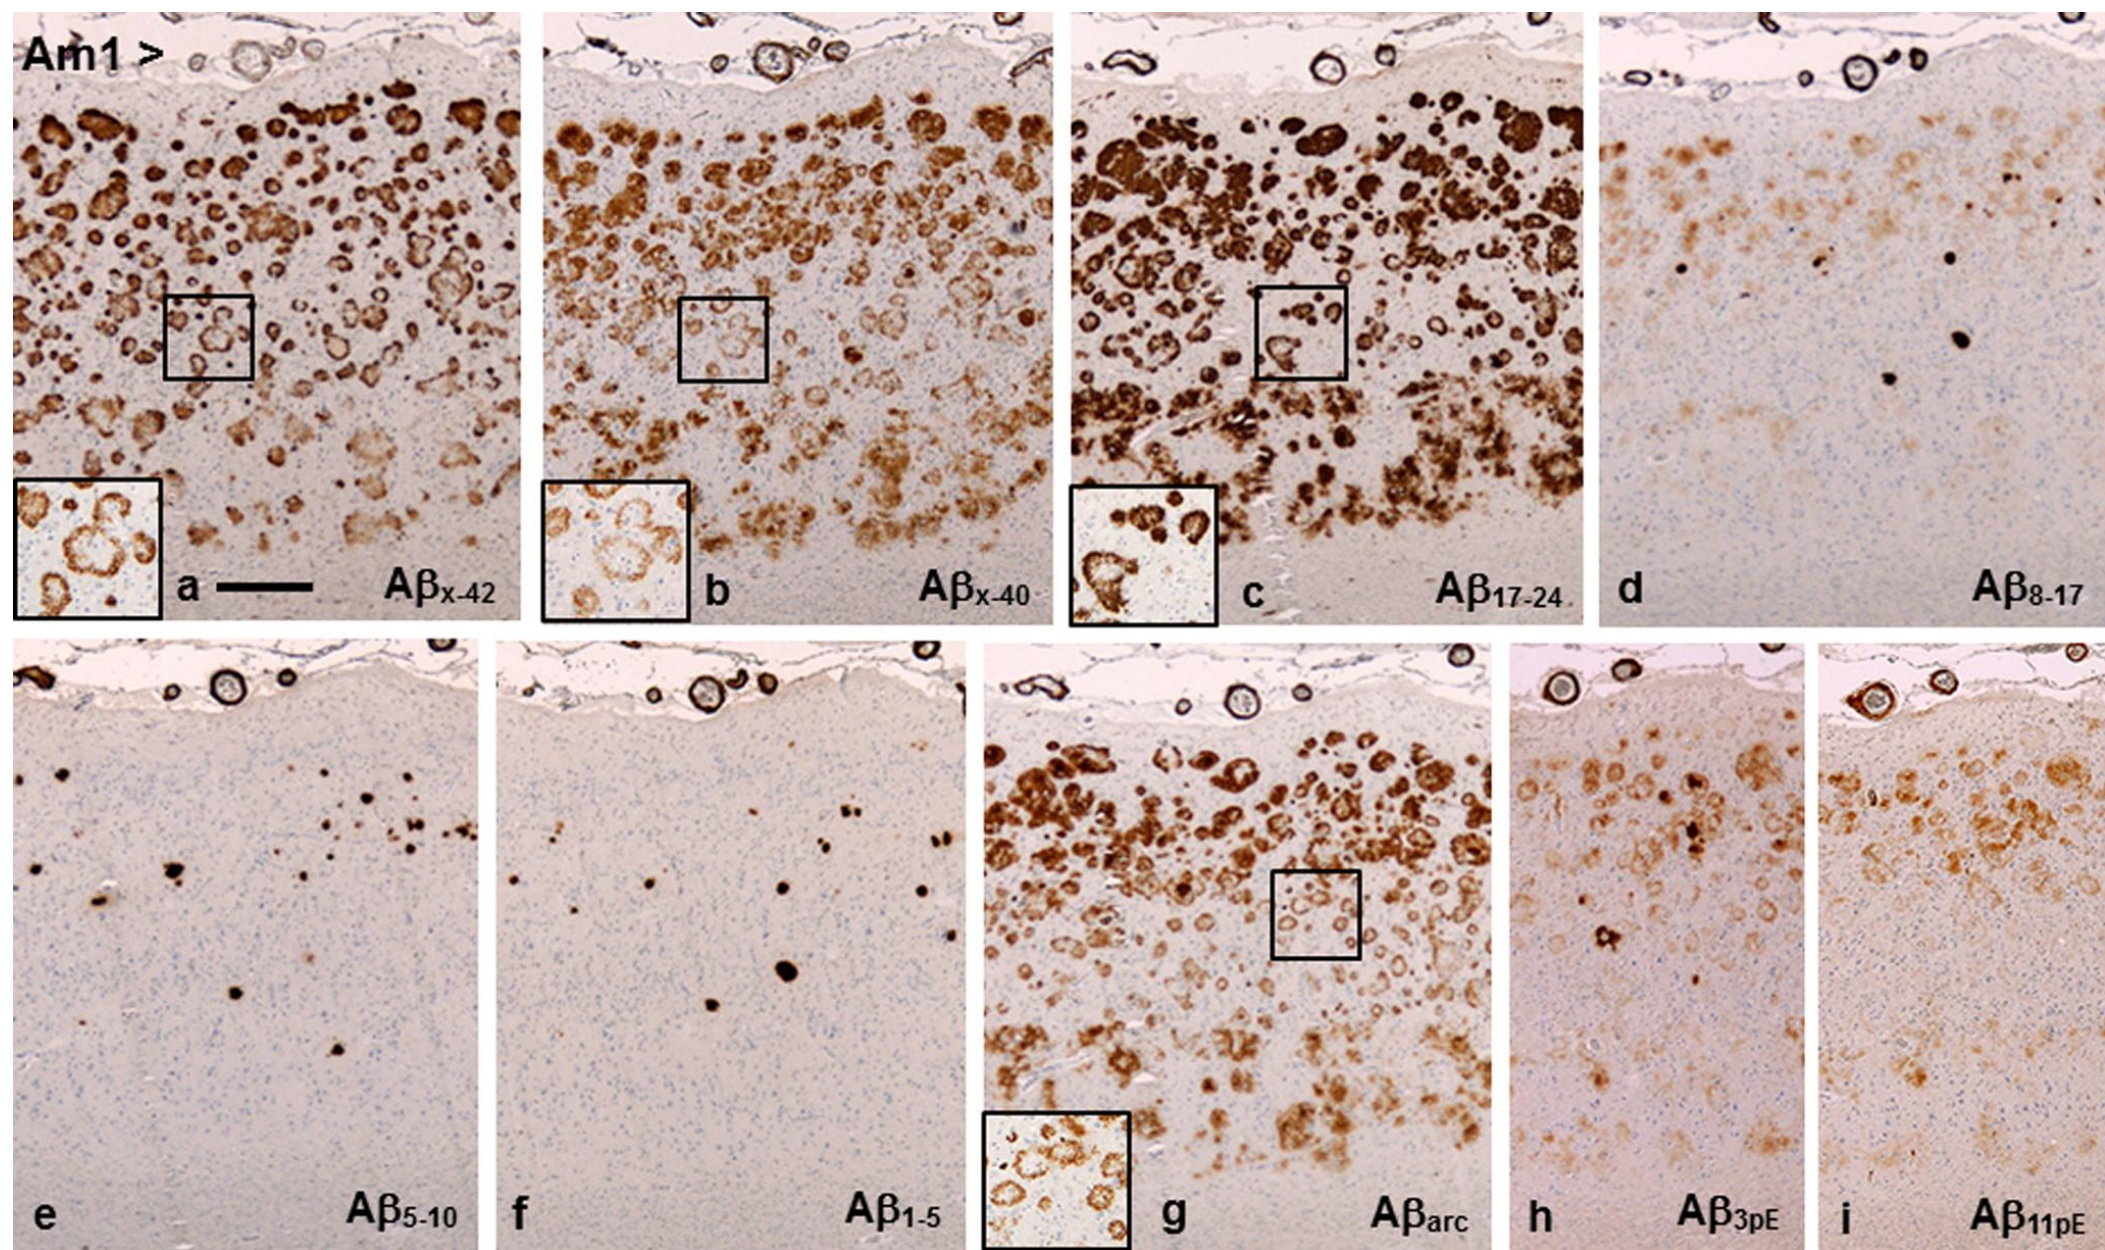

**Suppl. Fig. 1** In semiconsecutive sections from Am1 patient's frontal cortex the plaques appear ring-shaped with C-terminal abA $\beta_{x-42}$  and abA $\beta_{x-40}$ , mid-domain abA $\beta_{17-24}$  and Arctic specific abA $\beta_{arc}$  (**a-c** and **g** plus insets), whereas with more N-terminal (beyond aa 17) abA $\beta_{8-17}$ , abA $\beta_{5-10}$  and abA $\beta_{1-5}$  (**d-f**) the plaques stain progressively weaker, although some plaques have intensely stained centres. Robust staining with abA $\beta_{arc}$  suggests an abundance of Arctic A $\beta$  and a fair amount of A $\beta$  appears to have pyroglutamate at positions 3 and 11 (**h** and **i**). The lesser number of plaques in layer 4 creates a sparsely populated band, best visible in **b-d** and **g-i** (similar band was observed in Am2 patient). No plaques are detectable in layer 1. Leptomeningeal blood vessels in **b-i** are strongly A $\beta$ -positive, whereas in **a** they are only weakly positive. (*bar* in **a** 300  $\mu$ m for all panels)
